# Supplementary material for: Explaining the excess mortality in Scotland compared with England: pooling of 18 cohort studies
Source: PubMed Central journal article supplement — J Epidemiol Community Health. 2014 Sep 12;69(1):20–7. doi: 10.1136/jech-2014-204185 (PMC4283682; doi:10.1136/jech-2014-204185), 2014-09-12
Supplement: jech-2014-204185-s1.pdf [file jech-2014-204185-s1.pdf]

**Webfigure 1 - Flow chart of participants from initial pooled sample to analytic sample: follow-up of eighteen cohort studies from the Health Survey for England and Scottish Health Survey**

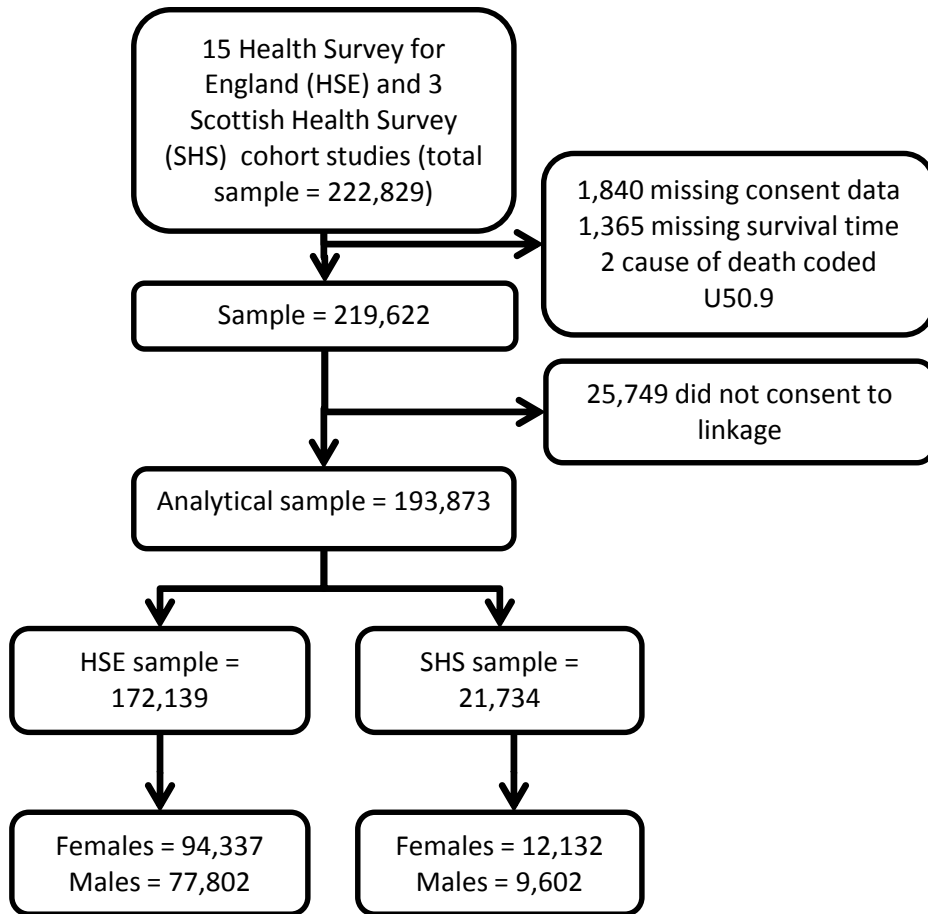

**Note:** The ICD 10 code U50.9 denotes an ‘event awaiting determination of event’ (i.e. there hasn’t been a complete assessment concluding an undetermined cause of death). These deaths have therefore been excluded from the analyses.

**Webtable 1 - Characteristics of survey participants who consented and did not consent to record linkage(*N* = 193,873)**

|                                                                  | <b>Consented</b> | <b>Did not consent</b> | <b><i>P</i>-value</b> |
|------------------------------------------------------------------|------------------|------------------------|-----------------------|
| N                                                                | 193,873          | 25,749                 | -                     |
| Age (mean [SD])                                                  | 46.9 (18.5)      | 49.0 (20.4)            | <0.001                |
| Female (%)                                                       | 54.9             | 57.5                   | <0.001                |
| Non-manual occupational social class (I-IIIINM) (%)              | 56.6             | 53.4                   | <0.001                |
| Left school $\geq 16$ (approximates to compulsory education) (%) | 66.8             | 64.4                   | <0.001                |
| Current smoker (%)                                               | 26.2             | 23.4                   | <0.001                |
| Drinks alcohol at least weekly (%)                               | 61.6             | 48.7                   | <0.001                |
| Self-assessed general health good or very good (%)               | 74.5             | 70.0                   | <0.001                |
| Longstanding illness (%)                                         | 44.0             | 41.8                   | <0.001                |

**Webtable 2 - Baseline characteristics of study members pooled according to survey: follow-up of eighteen cohort studies from the Health Survey for England and Scottish Health Survey ( $N = 193,873$ )**

|                                                                  | <b>Health Survey<br/>for England</b> | <b>Scottish<br/>Health Survey</b> | <b><i>P</i>-<br/>value</b> |
|------------------------------------------------------------------|--------------------------------------|-----------------------------------|----------------------------|
| N                                                                | 172,139                              | 21,734                            | -                          |
| Age (mean [SD])                                                  | 47.0 (18.8)                          | 45.7 (16.2)                       | <0.001                     |
| Female (%)                                                       | 54.8                                 | 55.8                              | 0.004                      |
| Non-manual occupational social class (I-IIIINM) (%)              | 57.1                                 | 52.5                              | <0.001                     |
| Left school $\geq 16$ (approximates to compulsory education) (%) | 67.2                                 | 63.6                              | <0.001                     |
| Current smoker (%)                                               | 25.3                                 | 32.8                              | <0.001                     |
| Drinks alcohol at least weekly (%)                               | 61.6                                 | 61.2                              | <0.001                     |
| Self-assessed general health good or very good (%)               | 74.6                                 | 73.6                              | <0.001                     |
| Longstanding illness (%)                                         | 44.3                                 | 42.3                              | <0.001                     |
| Prescribed antidepressant <sup>1</sup>                           | 9.2                                  | 9.5                               | 0.308                      |
| Prescribed anxiolytic <sup>2</sup>                               | 1.2                                  | 2.0                               | <0.001                     |

<sup>1</sup> British National Formulary (BNF) chapter 4.3. There are substantial missing data and the reported percentages are of the total participants with medication recorded, rather than the entire sample.

<sup>2</sup> British National Formulary (BNF) chapter 4.1.2. There are substantial missing data and the reported percentages are of the total participants with medication recorded, rather than the entire sample.

**Webtable 3 - Hazard ratios (95% confidence interval) for Scotland relative to England for all-cause mortality, and deaths from all cancers, smoking-related cancers and site-specific cancers: Scotland relative to England (N = 193,873)**

| Model                        | Age & sex-adjusted <sup>1</sup> |         |             |                      |         | Fully adjusted <sup>2</sup> |         |             |                      |         |
|------------------------------|---------------------------------|---------|-------------|----------------------|---------|-----------------------------|---------|-------------|----------------------|---------|
|                              | Deaths                          | N       | HSE HR      | SHS HR               | P-value | Deaths                      | N       | HSE HR      | SHS HR               | P-value |
| All-cause mortality          | 21,345                          | 193,873 | 1<br>(ref.) | 1.40<br>(1.34, 1.47) | <0.001  | 20,330                      | 181,560 | 1<br>(ref.) | 1.29<br>(1.23, 1.36) | <0.001  |
| Cancer                       | 6,009                           | 193,873 | 1           | 1.54<br>(1.42, 1.66) | <0.001  | 5,818                       | 181,560 | 1           | 1.41<br>(1.30, 1.53) | <0.001  |
| Smoking-related <sup>3</sup> | 2,677                           | 193,873 | 1           | 1.91<br>(1.71, 2.12) | <0.001  | 2,605                       | 181,560 | 1           | 1.62<br>(1.45, 1.81) | <0.001  |
| Non-smoking-related          | 3,332                           | 193,873 | 1           | 1.26<br>(1.12, 1.40) | <0.001  | 3,213                       | 181,560 | 1           | 1.22<br>(1.09, 1.37) | 0.001   |
| Lung                         | 1,287                           | 193,873 | 1           | 2.20<br>(1.91, 2.58) | <0.001  | 1,260                       | 181,560 | 1           | 1.67<br>(1.43, 1.94) | <0.001  |
| Bowel                        | 539                             | 193,873 | 1           | 1.65<br>(1.28, 2.13) | <0.001  | 526                         | 181,560 | 1           | 1.63<br>(1.26, 2.12) | <0.001  |
| Breast (all)                 | 459                             | 193,873 | 1           | 1.39<br>(1.05, 1.82) | 0.020   | 424                         | 181,560 | 1           | 1.32<br>(0.99, 1.75) | 0.062   |
| Breast (female)              | 457                             | 106,469 | 1           | 1.39<br>(1.05, 1.83) | 0.018   | 422                         | 98,187  | 1           | 1.32<br>(0.99, 1.77) | 0.056   |
| Prostate (men)               | 364                             | 87,313  | 1           | 0.83<br>(0.52, 1.30) | 0.411   | 361                         | 83,283  | 1           | 0.86<br>(0.54, 1.35) | 0.500   |
| Pancreas                     | 317                             | 193,765 | 1           | 0.93<br>(0.62, 1.39) | 0.705   | 306                         | 181,461 | 1           | 0.88<br>(0.58, 1.34) | 0.560   |
| Oesophagus                   | 265                             | 193,835 | 1           | 2.35<br>(1.70, 3.25) | <0.001  | 258                         | 181,524 | 1           | 2.23<br>(1.60, 3.09) | <0.001  |
| Stomach                      | 205                             | 193,873 | 1           | 1.57<br>(1.03, 2.40) | 0.038   | 202                         | 181,560 | 1           | 1.47<br>(0.96, 2.25) | 0.079   |
| Bladder                      | 183                             | 193,659 | 1           | 1.70<br>(1.09, 2.65) | 0.020   | 177                         | 181,360 | 1           | 1.62<br>(1.04, 2.54) | 0.035   |
| Ovary (women)                | 164                             | 106,176 | 1           | 1.45<br>(0.92, 2.28) | 0.111   | 156                         | 97,926  | 1           | 1.41<br>(0.87, 2.27) | 0.159   |
| Non-Hodgkin's Lymphoma       | 160                             | 193,696 | 1           | 0.70<br>(0.37, 1.34) | 0.282   | 153                         | 181,396 | 1           | 0.74<br>(0.39, 1.40) | 0.351   |
| CNS cancer                   | 138                             | 193,690 | 1           | 1.74<br>(1.12, 2.71) | 0.014   | 137                         | 181,390 | 1           | 1.74<br>(1.12, 2.72) | 0.014   |
| Kidney                       | 137                             | 193,823 | 1           | 1.10<br>(0.62, 1.97) | 0.741   | 133                         | 181,513 | 1           | 1.11<br>(0.62, 1.99) | 0.718   |
| Leukaemia                    | 137                             | 193,785 | 1           | 2.25<br>(1.42, 3.56) | 0.001   | 128                         | 181,479 | 1           | 2.32<br>(1.45, 3.71) | <0.001  |
| Multiple myeloma             | 84                              | 193,686 | 1           | 1.72<br>(0.90, 3.27) | 0.101   | 81                          | 181,387 | 1           | 1.60<br>(0.81, 3.13) | 0.173   |
| Liver                        | 76                              | 193,385 | 1           | 2.84<br>(1.59, 5.09) | <0.001  | 72                          | 181,029 | 1           | 2.54<br>(1.37, 4.73) | 0.003   |
| Mesothelioma                 | 69                              | 193,140 | 1           | 2.04<br>(1.06, 3.93) | 0.033   | 69                          | 180,864 | 1           | 2.04<br>(1.06, 3.93) | 0.034   |

<sup>1</sup> Unless sex-specific analyses, where noted

<sup>2</sup> Model adjusted for age, sex, occupational social class, educational attainment, smoking status, frequency of alcohol consumption, self-assessed general health, and longstanding illness

<sup>3</sup> ICD-9 codes 141-151, 155.0, 157, 160.0, 160.2-160.9, 161, 162.2-162.9, 180, 188, 189, and 205 and ICD-10 codes C01-16, C22, C25, C30.0, C31, C32, C34, C53, C64, C65, C67, and C92, in line with WHO definitions. HR smoker vs non-smoker for smoking related cancer 1.74 (95% CI 1.61, 1.88); non-smoking-related cancer HR 0.65 (0.60, 0.71); all cancers HR 1.06 (1.00, 1.12).

**Webtable 4 - Hazard ratios (95% confidence interval) for all-cause mortality stratified by age-groups: Scotland relative to England (N= 193,873)**

| Model*                             | Age group |        |        |                      |         | 16-44  |        |        |                      |         | 45-64  |        |        |                      |         | 65+ |  |  |  |  |
|------------------------------------|-----------|--------|--------|----------------------|---------|--------|--------|--------|----------------------|---------|--------|--------|--------|----------------------|---------|-----|--|--|--|--|
|                                    | Deaths    | N      | HSE HR | SHS HR               | P-value | Deaths | N      | HSE HR | SHS HR               | P-value | Deaths | N      | HSE HR | SHS HR               | P-value |     |  |  |  |  |
| Age- & sex-adjusted (basic model)  | 1,023     | 94,532 | 1      | 1.68<br>(1.44, 1.97) | <0.001  | 4,733  | 59,873 | 1      | 1.71<br>(1.59, 1.83) | <0.001  | 15,589 | 39,468 | 1      | 1.19<br>(1.11, 1.28) | <0.001  |     |  |  |  |  |
| + Occupational social class        | 955       | 86,418 | 1      | 1.59<br>(1.35, 1.88) | <0.001  | 4,655  | 58,729 | 1      | 1.65<br>(1.53, 1.77) | <0.001  | 14,800 | 37,896 | 1      | 1.21<br>(1.12, 1.29) | <0.001  |     |  |  |  |  |
| + Educational attainment           | 1,021     | 94,457 | 1      | 1.66<br>(1.42, 1.94) | <0.001  | 4,730  | 59,848 | 1      | 1.67<br>(1.56, 1.79) | <0.001  | 15,567 | 39,428 | 1      | 1.19<br>(1.11, 1.27) | <0.001  |     |  |  |  |  |
| + Smoking status                   | 1,018     | 93,853 | 1      | 1.56<br>(1.33, 1.83) | <0.001  | 4,720  | 59,783 | 1      | 1.54<br>(1.43, 1.65) | <0.001  | 15,571 | 39,432 | 1      | 1.15<br>(1.07, 1.23) | <0.001  |     |  |  |  |  |
| + Frequency of alcohol consumption | 1,007     | 92,239 | 1      | 1.69<br>(1.44, 1.98) | <0.001  | 4,725  | 59,844 | 1      | 1.69<br>(1.58, 1.82) | <0.001  | 15,579 | 39,448 | 1      | 1.18<br>(1.10, 1.26) | <0.001  |     |  |  |  |  |
| + Self-assessed general health     | 1,022     | 94,516 | 1      | 1.67<br>(1.42, 1.95) | <0.001  | 4,733  | 59,859 | 1      | 1.66<br>(1.55, 1.79) | <0.001  | 15,584 | 39,460 | 1      | 1.21<br>(1.13, 1.30) | <0.001  |     |  |  |  |  |
| + Longstanding illness             | 1,023     | 94,510 | 1      | 1.70<br>(1.45, 1.99) | <0.001  | 4,732  | 59,857 | 1      | 1.71<br>(1.60, 1.84) | <0.001  | 15,586 | 39,462 | 1      | 1.21<br>(1.13, 1.30) | <0.001  |     |  |  |  |  |
| Multiply-adjusted <sup>1</sup>     | 950       | 85,182 | 1      | 1.54<br>(1.30, 1.81) | <0.001  | 4,633  | 58,580 | 1      | 1.47<br>(1.37, 1.58) | <0.001  | 14,747 | 37,798 | 1      | 1.17<br>(1.09, 1.25) | <0.001  |     |  |  |  |  |

\* Covariates selected from potentially relevant variables because data for these variables were missing in less than 20% of participants

‡ The unadjusted HR suggests in some models that death rates are lower in Scotland but the age distributions of the two samples are different – the HSE cohorts are older

<sup>1</sup> Model adjusted for age, sex, occupational social class, educational attainment, smoking status, frequency of alcohol consumption, self-assessed general health, and longstanding illness

**Webtable 5 - Hazard ratios (95% confidence interval) for all-cause mortality stratified by occupational social class: Scotland relative to England (*N* = 193,873)**

| Model*                             | I - Professional      |        |           |                      |                 | II – Managerial/Technical |        |           |                      |                 | IINM – Skilled non-manual |        |           |                      |                 |
|------------------------------------|-----------------------|--------|-----------|----------------------|-----------------|---------------------------|--------|-----------|----------------------|-----------------|---------------------------|--------|-----------|----------------------|-----------------|
|                                    | Deaths                | N      | HSE<br>HR | SHS<br>HR            | <i>P</i> -value | Deaths                    | N      | HSE<br>HR | SHS<br>HR            | <i>P</i> -value | Deaths                    | N      | HSE<br>HR | SHS<br>HR            | <i>P</i> -value |
| Age- & sex-adjusted (basic model)  | 592                   | 8,402  | 1         | 0.79<br>(0.54, 1.14) | 0.204           | 4,304                     | 50,036 | 1         | 1.30<br>(1.17, 1.44) | <0.001          | 4,249                     | 44,717 | 1         | 1.37<br>(1.23, 1.53) | <0.001          |
| + Educational attainment           | 592                   | 8,399  | 1         | 0.80<br>(0.55, 1.16) | 0.243           | 4,299                     | 50,020 | 1         | 1.30<br>(1.17, 1.44) | <0.001          | 4,245                     | 44,701 | 1         | 1.36<br>(1.22, 1.52) | <0.001          |
| + Smoking status                   | 592                   | 8,398  | 1         | 0.78<br>(0.54, 1.14) | 0.198           | 4,297                     | 49,980 | 1         | 1.23<br>(1.11, 1.37) | <0.001          | 4,248                     | 44,559 | 1         | 1.31<br>(1.18, 1.47) | <0.001          |
| + Frequency of alcohol consumption | 592                   | 8,397  | 1         | 0.79<br>(0.55, 1.14) | 0.211           | 4,301                     | 49,980 | 1         | 1.29<br>(1.16, 1.43) | <0.001          | 4,245                     | 44,374 | 1         | 1.36<br>(1.21, 1.51) | <0.001          |
| + Self-assessed general health     | 592                   | 8,400  | 1         | 0.83<br>(0.58, 1.21) | 0.338           | 4,303                     | 50,029 | 1         | 1.28<br>(1.16, 1.42) | <0.001          | 4,248                     | 44,710 | 1         | 1.41<br>(1.26, 1.58) | <0.001          |
| + Longstanding illness             | 592                   | 8,402  | 1         | 0.81<br>(0.56, 1.18) | 0.269           | 4,303                     | 50,026 | 1         | 1.32<br>(1.19, 1.46) | <0.001          | 4,248                     | 44,709 | 1         | 1.39<br>(1.25, 1.56) | <0.001          |
| Multiply-adjusted <sup>1</sup>     | 592                   | 8,389  | 1         | 0.85<br>(0.59, 1.23) | 0.392           | 4,287                     | 49,903 | 1         | 1.21<br>(1.09, 1.35) | <0.001          | 4,238                     | 44,278 | 1         | 1.33<br>(1.19, 1.49) | <0.001          |
| Model*                             | IIIM – Skilled manual |        |           |                      |                 | IV – Semi-skilled manual  |        |           |                      |                 | V – Unskilled manual      |        |           |                      |                 |
|                                    | Deaths                | N      | HSE<br>HR | SHS<br>HR            | <i>P</i>        | Deaths                    | N      | HSE<br>HR | SHS<br>HR            | <i>P</i>        | Deaths                    | N      | HSE<br>HR | SHS<br>HR            | <i>P</i>        |
| Age- & sex-adjusted (basic model)  | 5,156                 | 35,070 | 1         | 1.45<br>(1.32, 1.58) | <0.001          | 3,951                     | 32,645 | 1         | 1.39<br>(1.25, 1.55) | <0.001          | 2,044                     | 11,324 | 1         | 1.49<br>(1.30, 1.71) | <0.001          |
| + Educational attainment           | 5,150                 | 35,040 | 1         | 1.43<br>(1.31, 1.56) | <0.001          | 3,947                     | 32,624 | 1         | 1.38<br>(1.24, 1.53) | <0.001          | 2,042                     | 11,317 | 1         | 1.49<br>(1.30, 1.70) | <0.001          |
| + Smoking status                   | 5,147                 | 34,959 | 1         | 1.37<br>(1.25, 1.50) | <0.001          | 3,944                     | 32,503 | 1         | 1.28<br>(1.15, 1.43) | <0.001          | 2,038                     | 11,281 | 1         | 1.40<br>(1.22, 1.61) | <0.001          |
| + Frequency of alcohol consumption | 5,154                 | 34,854 | 1         | 1.44<br>(1.32, 1.58) | <0.001          | 3,947                     | 32,357 | 1         | 1.39<br>(1.25, 1.54) | <0.001          | 2,037                     | 11,216 | 1         | 1.49<br>(1.30, 1.70) | <0.001          |
| + Self-assessed general health     | 5,155                 | 35,062 | 1         | 1.41<br>(1.29, 1.54) | <0.001          | 3,950                     | 32,637 | 1         | 1.38<br>(1.25, 1.54) | <0.001          | 2,042                     | 11,321 | 1         | 1.49<br>(1.30, 1.71) | <0.001          |
| + Longstanding illness             | 5,156                 | 35,063 | 1         | 1.45<br>(1.33, 1.59) | <0.001          | 3,950                     | 32,638 | 1         | 1.40<br>(1.26, 1.56) | <0.001          | 2,044                     | 11,322 | 1         | 1.48<br>(1.29, 1.69) | <0.001          |
| Multiply-adjusted <sup>1</sup>     | 5,138                 | 34,750 | 1         | 1.31<br>(1.20, 1.44) | <0.001          | 3,934                     | 32,236 | 1         | 1.27<br>(1.14, 1.41) | <0.001          | 2,029                     | 11,174 | 1         | 1.40<br>(1.22, 1.61) | <0.001          |

\* Covariates selected from potentially relevant variables because data for these variables were missing in less than 20% of participants

<sup>1</sup> Model adjusted for age, sex, educational attainment, smoking status, frequency of alcohol consumption, self-assessed general health, and longstanding illness

**Webtable 6 – Subgroup adjusted analyses\*—Hazard ratios (95% confidence interval) for all-cause mortality, cardiovascular disease and all cancers: Scotland relative to England (N = 193,873)**

| Model                                              | All-cause Mortality |         |             |                      |         | Cardiovascular disease |         |             |                      |         | Cancer |         |             |                      |         |
|----------------------------------------------------|---------------------|---------|-------------|----------------------|---------|------------------------|---------|-------------|----------------------|---------|--------|---------|-------------|----------------------|---------|
|                                                    | Deaths              | N       | HSE HR      | SHS HR               | P-value | Deaths                 | N       | HSE HR      | SHS HR               | P-value | Deaths | N       | HSE HR      | SHS HR               | P-value |
| Age- & sex-adjusted (basic model)                  | 21,345              | 193,873 | 1<br>(ref.) | 1.40<br>(1.34, 1.47) | <0.001  | 7,372                  | 193,873 | 1<br>(ref.) | 1.37<br>(1.26, 1.48) | <0.001  | 6,009  | 193,873 | 1<br>(ref.) | 1.54<br>(1.42, 1.66) | <0.001  |
| + Doctor-diagnosed CVD (any)                       | 11,274              | 106,375 | 1           | 1.41<br>(1.34, 1.48) | <0.001  | 3,896                  | 106,375 | 1           | 1.34<br>(1.23, 1.46) | <0.001  | 3,126  | 106,375 | 1           | 1.66<br>(1.53, 1.81) | <0.001  |
| + Doctor-diagnosed CVD (stroke or IHD)             | 11,357              | 106,741 | 1           | 1.40<br>(1.33, 1.47) | <0.001  | 3,928                  | 106,741 | 1           | 1.32<br>(1.21, 1.44) | <0.001  | 3,145  | 106,741 | 1           | 1.66<br>(1.53, 1.81) | <0.001  |
| + Doctor-diagnosed hypertension                    | 8,996               | 89,358  | 1           | 1.45<br>(1.37, 1.53) | <0.001  | 3,164                  | 89,358  | 1           | 1.46<br>(1.33, 1.60) | <0.001  | 2,405  | 89,358  | 1           | 1.70<br>(1.54, 1.87) | <0.001  |
| + Diabetes <sup>3</sup>                            | 18,159              | 146,144 | 1           | 1.35<br>(1.29, 1.41) | <0.001  | 6,351                  | 146,144 | 1           | 1.33<br>(1.23, 1.44) | <0.001  | 4,959  | 146,144 | 1           | 1.49<br>(1.38, 1.62) | <0.001  |
| + Portions of fruit and vegetables eaten yesterday | 5,380               | 90,084  | 1           | 1.31<br>(1.20, 1.44) | <0.001  | 1,725                  | 103,789 | 1           | 1.51<br>(1.30, 1.76) | <0.001  | 1,518  | 90,084  | 1           | 1.39<br>(1.18, 1.63) | <0.001  |
| + Height (cm)                                      | 17,551              | 181,798 | 1           | 1.43<br>(1.36, 1.50) | <0.001  | 5,913                  | 181,798 | 1           | 1.41<br>(1.29, 1.54) | <0.001  | 5,380  | 181,798 | 1           | 1.55<br>(1.43, 1.68) | <0.001  |
| + Body mass index (kg/m <sup>2</sup> )             | 17,018              | 174,427 | 1           | 1.44<br>(1.37, 1.52) | <0.001  | 5,736                  | 174,427 | 1           | 1.43<br>(1.31, 1.57) | <0.001  | 5,213  | 174,427 | 1           | 1.55<br>(1.42, 1.68) | <0.001  |
| + Systolic blood pressure <sup>2</sup> (mmHg)      | 13,298              | 122,901 | 1           | 1.44<br>(1.36, 1.52) | <0.001  | 4,584                  | 122,901 | 1           | 1.38<br>(1.26, 1.52) | <0.001  | 3,842  | 122,901 | 1           | 1.61<br>(1.48, 1.76) | <0.001  |
| + Diastolic blood pressure <sup>2</sup> (mmHg)     | 13,298              | 122,901 | 1           | 1.44<br>(1.36, 1.52) | <0.001  | 4,584                  | 122,901 | 1           | 1.40<br>(1.27, 1.54) | <0.001  | 3,842  | 122,901 | 1           | 1.61<br>(1.48, 1.76) | <0.001  |
| + Antidepressant use                               | 11,639              | 68,880  | 1           | 1.37<br>(1.30, 1.46) | <0.001  | 4,194                  | 68,880  | 1           | 1.37<br>(1.24, 1.52) | <0.001  | 3,002  | 68,880  | 1           | 1.55<br>(1.39, 1.71) | <0.001  |
| + Anxiolytic use                                   | 11,639              | 57,244  | 1           | 1.37<br>(1.29, 1.46) | <0.001  | 4,194                  | 68,877  | 1           | 1.37<br>(1.24, 1.52) | <0.001  | 3,002  | 68,877  | 1           | 1.55<br>(1.39, 1.71) | <0.001  |
| + Fixed Vital Capacity (FVC)                       | 7,333               | 56,978  | 1           | 1.22<br>(1.14, 1.30) | <0.001  | 2,509                  | 56,978  | 1           | 1.09<br>(0.97, 1.23) | 0.151   | 2,302  | 56,974  | 1           | 1.38<br>(1.23, 1.54) | <0.001  |
| + FVC and smoking status                           | 7,319               | 56,725  | 1           | 1.17<br>(1.10, 1.25) | <0.001  | 2,506                  | 56,725  | 1           | 1.06<br>(0.94, 1.19) | 0.347   | 2,297  | 56,721  | 1           | 1.31<br>(1.18, 1.47) | <0.001  |
| + Forced Expiratory Volume in 1 second             | 7,333               | 56,978  | 1           | 1.18<br>(1.10, 1.26) | <0.001  | 2,509                  | 56,978  | 1           | 1.06<br>(0.94, 1.19) | 0.352   | 2,302  | 56,974  | 1           | 1.35<br>(1.21, 1.51) | <0.001  |
| + FEV <sub>1</sub> and smoking status              | 7,319               | 56,725  | 1           | 1.14<br>(1.07, 1.22) | <0.001  | 2,506                  | 56,725  | 1           | 1.03<br>(0.92, 1.16) | 0.581   | 2,297  | 56,721  | 1           | 1.30<br>(1.16, 1.45) | <0.001  |
| + Peak flow                                        | 7,333               | 56,978  | 1           | 1.16<br>(1.08, 1.24) | <0.001  | 2,509                  | 56,978  | 1           | 1.04<br>(0.93, 1.17) | 0.492   | 2,302  | 56,974  | 1           | 1.33<br>(1.19, 1.49) | <0.001  |
| + Peak flow and smoking status                     | 7,319               | 56,725  | 1           | 1.12<br>(1.04, 1.20) | 0.001   | 2,506                  | 56,725  | 1           | 1.01<br>(0.91, 1.14) | 0.811   | 2,297  | 56,721  | 1           | 1.28<br>(1.14, 1.43) | <0.001  |
| + Physical activity <sup>4</sup>                   | 11,367              | 118,563 | 1           | 1.50<br>(1.42, 1.57) | <0.001  | 3,923                  | 118,563 | 1           | 1.45<br>(1.33, 1.58) | <0.001  | 3,333  | 118,563 | 1           | 1.65<br>(1.52, 1.80) | <0.001  |
| + Psychological distress <sup>1</sup>              | 17,368              | 166,631 | 1           | 1.42<br>(1.35, 1.48) | <0.001  | 5,922                  | 166,631 | 1           | 1.39<br>(1.28, 1.51) | <0.001  | 4,994  | 166,631 | 1           | 1.56<br>(1.44, 1.69) | <0.001  |

\* These models are adjusted for age and sex plus individual covariates. These were not included in the preceding tables and the fully adjusted models because data are missing for these variables in more than 20% of participants. Since the patterns of missing data do not exactly coincide, a model adjusting for all these covariates at the same time would result in none or very few deaths). However the pattern of missingness is different – in Scotland data are present in the most recent survey only (2003), in England just in the earlier surveys (1994-2002).

<sup>1</sup> Measured by the 12-item General Health Questionnaire

<sup>2</sup> Mean of 2<sup>nd</sup> and 3<sup>rd</sup> readings

<sup>3</sup> Diabetes indicator incorporating doctor-diagnosed diabetes, longstanding illness (diabetes) and HbA1c

<sup>4</sup> Number of weekly episodes of physical activity including domestic

**Webtable 7 - Comparison of using calendar time from survey date (adjusting for age) with using age as the timescale in Cox proportional hazards models: follow-up of eighteen cohort studies from the Health Survey for England and Scottish Health Survey (N = 193,873)**

|                          | <b>Deaths</b> | <b>Total N</b> | <b>Calendar time<br/>(age-adjusted)<br/>HR (95% CI)</b> | <b>Age as timescale<br/>(unadjusted)<br/>HR (95% CI)</b> |
|--------------------------|---------------|----------------|---------------------------------------------------------|----------------------------------------------------------|
| Total mortality          | 21,345        | 193,873        | 1.39 (1.33, 1.45)                                       | 1.68 (1.60, 1.76)                                        |
| Cancer                   | 6,009         | 193,873        | 1.53 (1.41, 1.65)                                       | 1.88 (1.74, 2.03)                                        |
| Cardiovascular disease   | 7,372         | 193,873        | 1.36 (1.25, 1.47)                                       | 1.64 (1.51, 1.78)                                        |
| Ischaemic heart disease  | 3,571         | 193,873        | 1.59 (1.42, 1.76)                                       | 1.97 (1.78, 2.19)                                        |
| Stroke                   | 1,793         | 193,873        | 1.42 (1.20, 1.68)                                       | 1.67 (1.42, 1.98)                                        |
| External (intentional)   | 122           | 193,873        | 1.82 (1.17, 2.85)                                       | 2.16 (1.38, 3.39)                                        |
| External (unintentional) | 418           | 193,873        | 0.95 (0.68, 1.32)                                       | 1.31 (0.94, 1.82)                                        |
| Alcohol-related deaths   | 252           | 193,873        | 5.39 (4.17, 6.96)                                       | 6.49 (5.02, 8.38)                                        |
| Drug-related poisonings  | 50            | 193,873        | 3.83 (2.13, 6.88)                                       | 4.34 (2.41, 7.80)                                        |
